1 **Efficacy and gut dysbiosis of gentamicin-intercalated smectite as a new**  
2 **therapeutic agent against *Helicobacter pylori* in a mouse model**

3

4

5 Su Jin Jeong<sup>1§</sup>, Kyoung Hwa Lee<sup>1§</sup>, Jie-Hyun Kim<sup>2</sup>, Soon Young Park<sup>1</sup>, and Young Goo Song<sup>1\*</sup>

6 <sup>1</sup>Division of Infectious Diseases, Department of Internal Medicine, Yonsei University College  
7 of Medicine, Seoul, Republic of Korea

8 <sup>2</sup>Division of Gastroenterology, Department of Internal Medicine, Yonsei University College of  
9 Medicine, Seoul, Republic of Korea

10

11

12 §These authors contributed equally to this work

13

14 **Running title:** S-GM as a new therapeutic agent against *H. pylori*

15

16

17

18

19

20 \*Corresponding author: Young Goo Song, MD, PhD.

21 Division of Infectious Diseases, Department of Internal Medicine, Yonsei University College  
22 of Medicine, 211 Eonju-ro, Gangnam-gu, Seoul 06273, Korea. Tel: +82-2-2019-3319, Fax:  
23 +82-2-3463-3882, Email: [imfell@yuhs.ac](mailto:imfell@yuhs.ac)

24 **Abstract**

25 **Background:** *Helicobacter pylori* eradication rate with conventional standard therapy is  
26 decreasing owing to antibiotic resistance, necessitating novel antibacterial strategies against *H.*  
27 *pylori*. We evaluated the efficacy of a gentamicin-intercalated smectite hybrid (S-GM)-based  
28 treatment, and analyzed fecal microbiome composition in *H. pylori*-infected mice.

29 **Methodology:** To evaluate anti-*H. pylori* efficacy, mice were divided into eight groups, and  
30 *H. pylori* eradication was assessed by *Campylobacter*-like organism (CLO) test and PCR assay  
31 of *H. pylori* in gastric mucosa. One week after *H. pylori* eradication, proinflammatory cytokine  
32 levels and atrophic changes in gastric mucosa were examined. Stool specimens were collected  
33 and analyzed for microbiome changes. The S-GM-based triple regimen decreased bacterial  
34 burden *in vivo*, compared with that in untreated mice or mice treated with other regimens. The  
35 therapeutic reactions in the CLO test from gastric mucosa were both 90% in standard triple  
36 therapy and S-GM therapy group, respectively. Those of *H. pylori* PCR in mouse gastric  
37 mucosa were significantly lower in standard triple therapy and S-GM therapy groups than in  
38 non-treatment group. Toxicity test results showed that S-GM therapy reduced IL-8 level and  
39 atrophic changes in gastric mucosa. Stool microbiome analysis revealed that compared with  
40 mice treated with the standard triple therapy, mice treated with the S-GM therapy showed  
41 microbiome diversity and abundant microorganisms at the phylum level.

42 **Conclusion:** Our results suggested that S-GM is a promising and effective therapeutic agent  
43 against *H. pylori* infection.

44

45 **Keywords:** *Helicobacter pylori*, gentamicin-intercalated smectite hybrid, fecal microbiota

46

47

48

49 **Author summary**

50 The eradication rate on *Helicobacter pylori* (*H. pylori*) showed decreasing trend due to  
51 antibiotic resistance, especially clarithromycin. Therefore, we made a smectite hybrid as a drug  
52 delivery system using aminoglycosides antibiotic- gentamicin, and applied it to the mouse  
53 stomach wall to confirm the localized therapeutic effect, and set the different treatment duration  
54 to verify the effect. As a result, it was confirmed that the therapeutic efficacy of gentamicin  
55 (GM)-intercalated smectite hybrid (S-GM) was not inferior to the existing standard triple  
56 therapy, based on amoxicillin and clarithromycin, and preserved the diversity of gut  
57 microbiome composition. Therefore, a S-GM treatment is expected to be a new alternative  
58 regimen to *H. pylori* infection.

## 59 **Introduction**

60 In 1983, Warren and Marchall described the gram-negative, spiral shaped microaerophilic  
61 bacterium *Helicobacter pylori* that colonizes the human stomach. *H. pylori* triggers numerous  
62 pathologic alterations in the stomach, including peptic ulcer disease, primary gastritis, and  
63 gastric cancer (1, 2). *H. pylori* eradication cures gastritis and alters the complication or  
64 recurrence of gastrointestinal diseases (3). The standard treatment for *H. pylori* infection is a  
65 triple therapy combining a proton pump inhibitor (PPI), clarithromycin, metronidazole, or  
66 amoxicillin (4). This regimen, however, fails to eradicate infection in 10–40% of patients and  
67 sometimes causes side effects (4-6). A major cause of this failure is the increase in multidrug-  
68 resistant *H. pylori* strains; hence, there is an alarming need to develop alternative antimicrobial  
69 agents with improved effectiveness.

70 Previously, we have confirmed that aminoglycosides have low minimum inhibitory  
71 concentration for recently isolated *H. pylori*, including major drug-resistant strains (7).  
72 However, aminoglycosides are polar, water-soluble compounds with very poor intestinal  
73 membrane permeability, resulting in low oral bioavailability (8, 9). Therefore, we used smectite  
74 clay, comprising tetrahedral sheets of SiO<sub>4</sub> units and octahedral sheets of Al<sup>3+</sup> ions (10), as a  
75 carrier of hydrophilic drugs to synthesize a gentamicin (GM)-intercalated smectite hybrid (S-  
76 GM) as a novel therapeutic agent. We previously identified that S-GM stably releases GM to  
77 the gastric wall, and a S-GM-based triple regimen decreases bacterial burden *in vivo* compared  
78 with that in untreated mice or mice treated with other regimens (11).

79 The human gut microbiota interacts with the host immune system and maintains metabolic  
80 homeostasis; thus, it is associated with obesity, inflammatory bowel disorder, allergic diseases,  
81 and neurological disorders (12, 13). Despite anatomical and compositional differences between  
82 human and mouse microbiota, some studies reported a concordance of microbiota shift in  
83 murine models and human diseases (14). Therefore, we analyzed changes in fecal microbiota

84 in an *H. pylori*-infected murine model to examine the toxicity of S-GM. Because S-GM is not  
85 absorbed in the gastrointestinal tract, it is impossible to evaluate its pharmacokinetics (PK) and  
86 pharmacodynamics (PD). Moreover, in contrast to previous studies (11), S-GM was  
87 administered less frequently in this study.

88 Here, we aimed to evaluate the effect of dosing interval on daily administration of S-GM and  
89 to assess the safety of S-GM. Changes in inflammatory cytokine levels, atrophy of gastric  
90 mucosa, and fecal microbiota were analyzed after eradication of *H. pylori* with S-GM and  
91 compared with those after the standard triple therapy.

92

## 93 **Results**

### 94 ***CLO test and PCR assay of *H. pylori* in gastric mucosa***

95 The S-GM-based regimen decreased *H. pylori* bacterial burden *in vivo*, compared with that in  
96 the untreated mice or mice treated with other regimens. Table 1 shows the therapeutic effect of  
97 each regimen on *H. pylori* infection. CLO test results showed that the therapeutic reactions in  
98 gastric mucosa were 90%, 90%, 80%, 80%, 70%, and 10% in Groups III, IV, V, VI, VII, and  
99 VIII, respectively (Table 1). The CLO scores of Groups III and IV were the lowest among the  
100 *H. pylori*-infected groups and were significantly lower than of Group II. The S-GM based  
101 therapy was not inferior to the standard triple therapy with amoxicillin and clarithromycin.  
102 Three or four doses per week also showed significant therapeutic results in the CLO test,  
103 although lower than that of daily administration.

104 PCR assay was conducted to evaluate the therapeutic effects of S-GM in *H. pylori*-infected  
105 mice (Table 2). The amount of *H. pylori* DNA in mouse gastric mucosa was significantly lower  
106 in Groups III–VIII than in Group II.

107

### 108 ***Proinflammatory cytokines and atrophy of gastric mucosa***

109 S-GM-based therapy reduced IL-8 and TNF- $\alpha$  levels compared with the standard triple  
110 therapy (Group III). The degree of atrophic changes in gastric mucosa was analyzed in gastric  
111 tissue specimens; compared with the standard triple therapy (Group III), S-GM based therapy  
112 (Group IV) led to less atrophic changes in mouse stomach (Table 3).

113

### 114 ***Changes in fecal microbiota***

115 Formetagenomic analysis of S-GM, changes in the diversity and abundance of stool  
116 microbiome were identified (Table 3). Alpha diversity was the lowest in the standard triple  
117 therapy group (Group III). Shannon and Chao1 indices were relatively preserved in the S-GM  
118 therapy group (Group IV) compared with those in the standard triple therapy group (Group III  
119 vs. Group IV, Shannon index,  $2.92 \pm 0.53$  vs.  $3.13 \pm 0.55$ ; Chao 1,  $245.71 \pm 121.23$  vs.  $440.45$   
120  $\pm 213.56$ ). Focusing on changes in abundance, the composition of stool microbiome was  
121 analyzed at the phylum and class levels. The abundance in Group III was significantly reduced,  
122 but preserved in Group IV with a similar trend as that in Group II (Figure 1 and 2).

123 Principal coordinates analysis (PCoA) was conducted to compare microbial communities  
124 between the four groups. Group I and II showed similar trends, whereas Group III showed a  
125 distinctly different trend of microbiome composition. Group IV, which was treated with S-GM  
126 therapy, showed moderate disposition (Figure 3).

127

### 128 **Discussion**

129 The existence of *H. pylori* in the human stomach has been known since as early as 60,000  
130 years ago (15); it has been isolated from the gastric antrum and cultivated *in vitro* (16). Early  
131 eradication-based therapies regress *H. pylori*-associated diseases (3, 4). However, the  
132 eradication treatment efficacy has been compromised in many countries owing to the  
133 increasing resistance to antimicrobial agents (4-6, 17, 18). Additionally, recurrence of *H. pylori*

134 remains a serious challenge worldwide, particularly in developing countries. The annual  
135 recurrence risk was 3.4% (95% CI, 3.1-3.7%) in high-income countries and 8.7% (95% CI,  
136 8.8-9.6%) in low-income countries.

137 To improve the eradication efficacy, studies continue to evaluate novel treatment regimens,  
138 including quintuple therapies (19), high-dose dual therapies (20), and standard triple therapies  
139 with probiotics (21). However, the evidence is insufficient, and the side and cost effects of such  
140 therapies should be considered.

141 In our previous work, we demonstrated the high anti-*H. pylori* efficacy of S-GM in reducing  
142 *H. pylori* load in mouse stomachs (11). Here, we found no significant difference between daily  
143 administration and three- or four-time administration a week of S-GM. Therefore, we examined  
144 the possibility of administration three or four times a week for *H. pylori* eradication. However,  
145 the single dose therapy (Group VIII) showed significantly reduced therapeutic effect. Further,  
146 in future studies, S-GM efficacy should be confirmed with reduced overall treatment durations,  
147 such as 3, 5, and 7 days of daily treatment, not three or four times per week.

148 However, we could still assess the efficacy of S-GM in eradicating *H. pylori* in this study.  
149 GM concentration in the S-GM hybrid was intercalated only up to 8 mg/kg. If GM  
150 concentration is increased, or if it is intercalated with another drug delivery system similar to  
151 smectite capable of delivering antibiotics to the stomach wall, we can achieve prolonged and  
152 improved drug release. Intercalation of GM high concentrations is difficult to consider owing  
153 to the systemic side effects associated with intravenous administration, but its effectiveness can  
154 be expected in targeted localized therapy, such as *H. pylori* eradication. Further research is  
155 needed to compare the therapeutic effect of S-GM with other drug delivery systems, such as  
156 alginate and a composite. With chitosan-treated beads, alginated-antibiotics hybrids may  
157 achieve pH-dependent retarded release of highly soluble drug (22).

158 In the present study, S-GM triple therapy reduced IL-8 level and atrophic changes in gastric

159 mucosa. Further, stool microbiome analysis showed that microbiome diversity and  
160 microorganism abundance at the phylum level were preserved in the S-GM triple therapy group.  
161 PK/PD analysis is required to examine the toxicity of S-GM; however, because S-GM is not  
162 absorbed systemically, PK/PD analysis is not feasible for S-GM. S-GM as a localized therapy  
163 showed bactericidal effect against *H. pylori* attached to the gastric wall. Therefore, toxicity  
164 analysis of this treatment was focused on changes in intestinal bacterial microbiome, and the  
165 results confirmed that the components of microbiome were well preserved compared with those  
166 after the standard therapy.

167 In this study, amoxicillin- and clarithromycin-based standard therapies have been shown to  
168 lead to microbiome dysbiosis, which is associated with various metabolic diseases,  
169 gastrointestinal diseases, and even gastric cancer. *H. pylori* infection itself as well as decreased  
170 microbial diversity and abundance are correlated with gastric carcinoma (23, 24). Therefore,  
171 our results indicated that S-GM therapy will not only block gastric carcinogenesis but also  
172 reduce the incidence of diseases, such as inflammatory bowel and metabolic diseases, by  
173 minimalizing changes in gut microbiota with low toxicity in addition to sufficient efficacy  
174 compared with standard therapy.

175 A previous *H. pylori* and microbiome study revealed a dramatic decrease in microbiome  
176 diversity immediately within 1 week after eradication, indicating that the bacterial community  
177 resembled and recovered the pre-antibiotic period only 4 years after a long-term follow-up. In  
178 humans, *Actinobacteria* was the most affected by antibiotics (25). In our mouse model study,  
179 *Actinobacteria* reduction was also noticeable after the use of amoxicillin and clarithromycin  
180 (Group III). Thus, to reduce prolonged dysbiosis and its consequences, it is necessary to  
181 eradicate *H. pylori* with minimal use of antibiotics, for which S-GM may be an effective  
182 strategy.

183 Therefore, to decrease antibiotic-related gut dysbiosis in patients and maintain microbiome



184 components, targeted therapy for *H. pylori* attached to the gastric wall is needed instead of  
185 therapy with systemic antibiotics. Moreover, the use of a smectite applied to the stomach wall  
186 as a drug delivery system would be a significant turning point for *H. pylori* eradication.

187 There were, however, several limitations in this study. First, the study used animal models;  
188 thus, the actual clinical dysbiosis may differ in humans. Second, the stool microbiome analysis  
189 was not conducted for each individual mouse, and stool was extracted within the same  
190 treatment group. The mouse itself could share the same microbiome environment owing to co-  
191 housing in the same cage (26, 27). Therefore, for more accurate analysis, it is necessary to  
192 analyze feces of each mouse subject and compare the individual eradication rate with a specific  
193 therapeutic regimen. Third, long-term follow-up after S-GM treatment is needed.

194 Nevertheless, this is the first study to verify the gut dysbiosis of the S-GM as an alternative  
195 therapy for *H. pylori* eradication to overcome the increasing antibiotic resistance to other  
196 regimens. Moreover, localized *H. pylori* eradication will make a novel paradigm shift in *H.*  
197 *pylori* treatment.

198

## 199 **Materials and Methods**

### 200 ***Intercalation of GM***

201 GM (2 mg/mL) solution was prepared using gentamicin sulfate of USP grade produced by  
202 BIO BASIC INC (Toronto, Canada). Ca-smectite was prepared by purifying the bentonite  
203 found in the area of Gampo, Korea. To generate a GM-intercalated smectite hybrid, GM  
204 solution was mixed with Ca-smectite to a concentration of 250 mL/g, and the mixture was  
205 stirred vigorously for 24 h. Next, the hybrid solution was dialyzed with 5 L of distilled water  
206 (DW) for ~8 h at 50°C, and the dialysis was repeated three to four times until sulfate ions could  
207 not be detected by PbCl<sub>2</sub>. A hybrid powder was finally obtained by freeze-drying the dialyzed  
208 hybrid solution for 2–3 days. The amount of GM released from the hybrid was determined by

209 batch-release test using 25 mL of pH 1.2 solution for 100 mg of the hybrid powder. The total  
210 amount of GM released within 1 h was determined to be ~5.0 mg per 100 mg of the hybrid.

211

### 212 ***Animal preparation***

213 The Institutional Animal Care and Use Committee at Daegu-Gyeongbuk Medical Innovation  
214 Foundation (DGMIF), Daegu, Korea, approved the animal procedures. Four-week-old male  
215 C57BL/6 mice were purchased from Japan SLC, Inc., Shizuoka, Japan. The mice were 5 weeks  
216 of age and weighed 18–20 g at the start of the experiment. The animal experiments were  
217 reviewed and approved by the Institutional Animal Care and Use Committee of the DGMIF.

218

### 219 ***Anti-*H. pylori* efficacy in vivo***

#### 220 *H. pylori* strains and culture conditions

221 *H. pylori* SS1 was used in this study. The bacteria were maintained and grown on Brucella  
222 agar (Merck, Germany) supplemented with 10% fetal bovine serum (Gibco, USA), and  
223 incubated under microaerobic conditions (5% O<sub>2</sub>, 10% CO<sub>2</sub>, and 85% N<sub>2</sub>) at 37 °C for 72 h.

224

#### 225 *Inoculation of experimental animals*

226 For *in vivo* assessment of anti-*H. pylori* effect, 80 mice were allowed to acclimatize for 1  
227 week before the initiation of the experiment. After the acclimatization period, the animals were  
228 fasted for 12 h, and 70 of them were intragastrically infected with 0.5 mL of 2.0×10<sup>9</sup> CFU/mL  
229 *H. pylori* suspension by oral gavage every 48 h, and this was repeated three times in 1 week.

230

#### 231 *Distribution of animals*

232 A total of 80 mice were used for analysis, and 70 *H. pylori*-infected mice were distributed  
233 into seven groups and allowed to rest for 1 week after the last inoculation. Group I was a normal

234 group consisting of uninfected mice. Group II, a negative control group, received DW as a  
235 vehicle. Group III, a positive control group, was treated with the standard triple therapy  
236 consisting of amoxicillin (AMX) (14.25 mg/kg), clarithromycin (CLR) (14.3 mg/kg), and a  
237 PPI (omeprazole 138 mg/kg). Group IV was treated with AMX (14.25 mg/kg), S-GM (which  
238 emitted 8 mg/kg of GM), and a PPI (138 mg/kg). Group V was treated with S-GM (which  
239 emitted 8 mg/kg of GM) and a PPI (138 mg/kg). Groups V–VIII were treated with the same  
240 regimen as that of Group IV, but with different administration intervals of four times per week,  
241 three times per week, and a single dose per week, respectively. In Groups I–IV, the treatments  
242 were orally administered to mice once a day for 7 consecutive days. The *H. pylori*-IgG level  
243 was checked with an ELISA kit (Cusabio Biotech Co., USA) before the treatment period to  
244 confirm the serological status of *H. pylori*-infected mice.

245

#### 246 *CLO test and PCR assay of H. pylori in gastric mucosa*

247 At 12 h after the last administration, mice were euthanized, and their stomachs were removed  
248 from their abdominal cavities. Samples of gastric mucosa from the pyloric region were assayed  
249 with CLO kits (Asan Pharmaceutical Co., Seoul, Korea) and incubated at 37°C for 12 h to  
250 examine urease activity. The reaction score was graded from 0 to 3 with 0 = no color change,  
251 1 = bright red, 2 = light purple, and 3 = dark red.

252 *H. pylori* DNA was prepared using the bead beater-phenol extraction method(28). A bacterial  
253 suspension was placed in a 2.0-mL screw-cap microcentrifuge tube filled with glass beads  
254 (Biospec Products, Bartlesville, OK, USA) and 200  $\mu$ L of phenol:chloroform:isoamyl alcohol  
255 solution (50:49:1). After an initial denaturation/activation step (95°C for 5 min), DNA (50 ng)  
256 was amplified in a 20- $\mu$ L volume for 35 cycles of denaturation (94°C for 60 s), annealing (62°C  
257 for 60 s), and extension (72°C for 90 s) using the following primers: *H. pylori*-specific *ureA*  
258 and *ureC*, sense, 5'-TGATGCTCCACTACGCTGGA-3', and antisense, 5'-

259 GGGTATGCACGGTTACGAGT-3' (expected product 265 bp); (29) and GAPDH, sense, 5'-  
260 TGGGGTGATGCTGGTGCTG-AG-3', and antisense, 5'-GGTTTCTCCAGGCGGCATGTC-  
261 3' (expected product 497 bp)(30). The PCR products were analyzed by electrophoresis in 1.5%  
262 agarose gels.

263

#### 264 *Proinflammatory cytokines and atrophy of gastric mucosa*

265 Plasma was obtained on day 21 through insertion of a heparinized microhematocrit tube into  
266 the ophthalmic venous plexus of mice. Plasma IL-8 and TNF- $\alpha$  levels were measured using  
267 mouse ELISA kits (R&D System, Minneapolis, MN, USA).

268 For histopathologic analysis, the stomach was fixed in 10% neutralized buffered formalin,  
269 and embedded in paraffin. Sections (4- $\mu$ m thick) were then stained with hematoxylin and eosin.  
270 The glandular mucosae of the corpus and antrum were examined histologically. Atrophic  
271 changes, as defined by atrophy of glandular cells and hyperplasia of mucus cells, were  
272 determined in a blinded fashion and scored based on the percentage of altered gastric  
273 mucosa(31): 0 = no mucosal alterations; 1 = less than 5%; 2 = 10% to 25%; 3 = 25% to 50%;  
274 and 4 = 50% to 75%.

275

#### 276 *Fecal microbiota*

##### 277 *DNA extraction from fecal materials*

278 After examination of IgG level post-treatment, the mice were sacrificed. Their feces were  
279 collected and frozen at -80°C until processed. From the fecal materials of each mouse, DNA  
280 was extracted using FastDNA<sup>®</sup> SPIN Kit (MP Biomedicals, Solon, OH, USA). The samples  
281 were lysed with FastPrep<sup>®</sup> Instruments and centrifuged, and DNA was isolated from the  
282 supernatant using the procedure of silica-based GENECLAN<sup>®</sup> and SPIN filters (MP  
283 Biomedicals, Solon, OH, USA)(32).

284

285 *PCR amplification and 16S rRNA gene sequencing*

286 Using the extracted metagenomics DNA as a template, PCR was performed for amplification  
287 of the V3-V4 regions of the bacterial 16S rRNA gene using the primers 341F (5'-  
288 TCGTCGGCAGCGTC-AGATGTGTATAAGAGACAG-CCTACGGGNGGCWGCAG-3';  
289 the underlined sequence indicates the target region primer) and 805R (5'-  
290 GTCTCGTGGGCTCGG-AGATGTGTATAAGAGACAG-  
291 ACTACHVGGGTATCTAATCC-3'). Next, secondary amplification for attachment of the  
292 Illumina NexTera barcode was performed using the following primers (X indicates the barcode  
293 region): i5 forward primer, 5'-AATGATACGGCGACCACCGAGATCTACAC-  
294 XXXXXXXX-TCGTCGGCAGCGTC-3'; and i7 reverse primer, 5'-  
295 CAAGCAGAAGACGGCATACGAGAT-XXXXXXXX-AGTCTCGTGGGCTCGG-3'. The  
296 PCR products were identified via 1% agarose gel electrophoresis and visualized in a Gel Doc  
297 system (BioRad, Hercules, CA, USA).

298 After purification of the amplified products using Clean PCR (CleanNA, Waddinxveen,  
299 Netherlands), qualified products were assessed on a Bioanalyzer 2100 (Agilent, Palo Alto, CA,  
300 USA). The libraries were prepared for analysis, and gene sequencing was performed using an  
301 Illumina MiSeq Sequencing system (Illumina, San Diego, CA, USA) according to the  
302 manufacturer's instructions.

303 .

304 *Bioinformatics for microbiota analysis*

305 The EzBioCloud 16S rRNA database (<https://www.ezbiocloud.net>) operated by ChunLab  
306 (ChunLab, Inc., Seoul, Korea) was used as a bioinformatics cloud platform for accurate  
307 pairwise and taxonomic assignments. Chimeric reads were filtered on reads with <97%  
308 similarity based on the UCHIME algorithm (33), and operational taxonomic units (OTU)s with

309 single and un-clustered reads are omitted from further analysis. Alpha diversity, which  
310 measures the diversity and abundance of bacterial species, was analyzed by the Shannon and  
311 Chao1 indices (34). Beta diversity was measured using PCoA derived from Jensen-Shannon  
312 (35). The Wilcoxon rank-sum test was used to examine differences in the number of OTUs.

313

### 314 ***Statistical analysis***

315 Data are presented as means  $\pm$  standard error, and the non-parametric Mann–Whitney test was  
316 used to compare groups. Multiple differences between groups were evaluated using one-way  
317 ANOVA multiple comparison test. The 95% confidential interval (CI) of the detection rate was  
318 obtained using the MINITAB statistical software (Minitab, Inc., State College, PA, USA). If  
319 two values were not overlapped between its 95% CI, the difference was considered significant.  
320 A *p* value of  $< 0.05$  was considered statistically significant. Results were analyzed using the  
321 Statistics Package for Social Science (SPSS 15.0 for Windows; SPSS Inc., Chicago, IL, USA).

322

### 323 **Acknowledgement**

324 We thank Myoung Ju Choi, Kwang Hoon Lee, and Jae Min Kim for helpful research support  
325 and discussions.

326 **Author contributions:** SJJ, KHL, JK and YGS conceived and designed the research, SYP  
327 performed the experiments. JHK, and YGS analyzed the data, SJJ and KHL wrote the draft,  
328 and YGS were involved in the review and editing of the final manuscript. All authors read and  
329 approved the final manuscript.

330

331 **Funding:** This work was supported by the Basic Research Project (Study No. GP2017-020) of  
332 the Korea Institute of Geoscience and Mineral Resources (KIGAM), funded by the Ministry of

333 Science, ICT, and Future Planning of Korea. This work was also supported by the Seyoung  
334 Association (SYH) research grant from the Department of Internal Medicine, Gangnam  
335 Severance Hospital (2017-GNS-001).

336 **Competing interests:** All authors report no potential conflicts of interest.

337

338

339 **Reference**

- 340 1. L. M. Coussens, Z. Werb, Inflammation and cancer. *Nature* **420**, 860-867 (2002).
- 341 2. J. G. Kusters, A. H. van Vliet, E. J. Kuipers, Pathogenesis of *Helicobacter pylori*  
342 infection. *Clin. Microbiol. Rev.* **19**, 449-490 (2006).
- 343 3. P. Malfertheiner *et al.*, Management of *Helicobacter pylori* infection-the Maastricht  
344 V/Florence Consensus Report. *Gut* **66**, 6-30 (2017).
- 345 4. N. R. O'Morain, M. P. Dore, A. J. O'Connor, J. P. Gisbert, C. A. O'Morain, Treatment  
346 of *Helicobacter pylori* infection in 2018. *Helicobacter* **23**, e12519 (2018).
- 347 5. N. O. Kaakoush, C. Asencio, F. Mégraud, G. L. Mendz, A redox basis for  
348 metronidazole resistance in *Helicobacter pylori*. *Antimicrob Agents Chemother*  
349 (*Bethesda*) **53**, 1884-1891 (2009).
- 350 6. Z. Song *et al.*, Prospective multi-region study on primary antibiotic resistance of  
351 *Helicobacter pylori* strains isolated from Chinese patients. *Dig. Liver Dis.* **46**, 1077-  
352 1081 (2014).
- 353 7. K. H. Lee *et al.*, Can aminoglycosides be used as a new treatment for *Helicobacter*  
354 *pylori*? In vitro activity of recently isolated *Helicobacter pylori*. *Infect. Chemother.* **51**  
355 (2019).
- 356 8. C. E. Cox, Gentamicin. *Med. Clin. North Am.* **54**, 1305-1315 (1970).
- 357 9. J. Recchia, M. H. Lurantos, J. A. Amsden, J. Storey, C. R. Kensil, A semisynthetic  
358 Quillaja saponin as a drug delivery agent for aminoglycoside antibiotics. *Pharm. Res.*  
359 **12**, 1917-1923 (1995).
- 360 10. F. Thomas *et al.*, Layer charge and electrophoretic mobility of smectites. *Colloids and*  
361 *Surfaces A: Physicochemical and Engineering Aspects* **159**, 351-358 (1999).
- 362 11. S. J. Jeong *et al.*, Gentamicin-intercalated smectite as a new therapeutic option for  
363 *Helicobacter pylori* eradication. *Journal of antimicrobial chemotherapy* **73**, 1324-1329



- 364 (2018).
- 365 12. J. K. Nicholson *et al.*, Host-gut microbiota metabolic interactions. *Science* **336**, 1262-  
366 1267 (2012).
- 367 13. C. A. Lozupone, J. I. Stombaugh, J. I. Gordon, J. K. Jansson, R. Knight, Diversity,  
368 stability and resilience of the human gut microbiota. *Nature* **489**, 220-230 (2012).
- 369 14. T. L. Nguyen, S. Vieira Silva, A. Liston, J. Raes, How informative is the mouse for  
370 human gut microbiota research? *Dis. Model. Mech.* **8**, 1-16 (2015).
- 371 15. Y. Moodley *et al.*, Age of the association between *Helicobacter pylori* and man. *PLoS*  
372 *Pathog.* **8**, e1002693-e1002693 (2012).
- 373 16. J. R. Warren, B. Marshall, Unidentified curved bacilli on gastric epithelium in active  
374 chronic gastritis. *Lancet (British edition)* **1**, 1273-1275 (1983).
- 375 17. Miftahussurur *et al.*, Surveillance of *Helicobacter pylori* Antibiotic Susceptibility in  
376 Indonesia: Different Resistance Types among Regions and with Novel Genetic  
377 Mutations. *PLoS ONE* **11**, e0166199-e0166199 (2016).
- 378 18. E. N. Ontsira Ngoyi *et al.*, Molecular Detection of *Helicobacter pylori* and its  
379 Antimicrobial Resistance in Brazzaville, Congo. *Helicobacter* **20**, 316-320 (2015).
- 380 19. N. de Bortoli *et al.*, *Helicobacter pylori* eradication: a randomized prospective study of  
381 triple therapy versus triple therapy plus lactoferrin and probiotics. *Am. J. Gastroenterol.*  
382 **102**, 951-956 (2007).
- 383 20. J. Yang *et al.*, High-dose dual therapy is superior to standard first-line or rescue therapy  
384 for *Helicobacter pylori* infection. *Clin. Gastroenterol. Hepatol.* **13**, 895-905.e895  
385 (2015).
- 386 21. B. Oh *et al.*, The Effect of Probiotics on Gut Microbiota during the *Helicobacter pylori*  
387 Eradication: Randomized Controlled Trial. *Helicobacter* **21**, 165-174 (2016).
- 388 22. H. H. Tønnesen, J. Karlsen, Alginate in drug delivery systems. *Drug Dev. Ind. Pharm.*

- 389           **28**, 621-630 (2002).
- 390   23.   R. M. Ferreira *et al.*, Gastric microbial community profiling reveals a dysbiotic cancer-  
391           associated microbiota. *Gut* **67**, 226-236 (2018).
- 392   24.   H. J. Jo *et al.*, Analysis of Gastric Microbiota by Pyrosequencing: Minor Role of  
393           Bacteria Other Than *Helicobacter pylori* in the Gastric Carcinogenesis. *Helicobacter*  
394           **21**, 364-374 (2016).
- 395   25.   H. E. Jakobsson *et al.*, Short-term antibiotic treatment has differing long-term impacts  
396           on the human throat and gut microbiome. *PLoS ONE* **5**, e9836-e9836 (2010).
- 397   26.   Z. Shi *et al.*, Segmented Filamentous Bacteria Prevent and Cure Rotavirus Infection.  
398           *Cell* **179**, 644-658.e613 (2019).
- 399   27.   S. J. Robertson *et al.*, Comparison of Co-housing and Littermate Methods for  
400           Microbiota Standardization in Mouse Models. *Cell Reports* **27**, 1910-1919.e1912  
401           (2019).
- 402   28.   B.-J. Kim *et al.*, Identification of mycobacterial species by comparative sequence  
403           analysis of the RNA polymerase gene (*rpoB*). *J. Clin. Microbiol.* **37**, 1714-1720 (1999).
- 404   29.   Y. B. Kim *et al.*, The influence of number of gastroscopic biopsy specimens on follow-  
405           up *Campylobacter*-Like Organism (CLO) test. *Korean J. Gastroenterol.* **35**, 422-428  
406           (2000).
- 407   30.   P. Kundu *et al.*, *Cag* pathogenicity island-independent up-regulation of matrix  
408           metalloproteinases-9 and -2 secretion and expression in mice by *Helicobacter pylori*  
409           infection. *Journal of biological chemistry* **281**, 34651-34662 (2006).
- 410   31.   J. G. Fox *et al.*, Concurrent enteric helminth infection modulates inflammation and  
411           gastric immune responses and reduces *helicobacter*-induced gastric atrophy. *Nat. Med.*  
412           **6**, 536-542 (2000).
- 413   32.   A. Layton *et al.*, Development of *Bacteroides* 16S rRNA gene TaqMan-based real-time

- 414 PCR assays for estimation of total, human, and bovine fecal pollution in water. *Appl.*  
415 *Environ. Microbiol.* **72**, 4214-4224 (2006).
- 416 33. R. C. Edgar, B. J. Haas, J. C. Clemente, C. Quince, R. Knight, UCHIME improves  
417 sensitivity and speed of chimera detection. *Bioinformatics* **27**, 2194-2200 (2011).
- 418 34. A. D. Willis, Rarefaction, alpha diversity, and statistics. *Front. Microbiol.* **10**, 2407  
419 (2019).
- 420 35. J. Lin, Divergence measures based on the Shannon entropy. *IEEE Trans. Inf. Theory*  
421 **37**, 145-151 (1991).

## Tables

**Table 1. Individual data of CLO test of mouse gastric mucosa after treatment of HP infection**

| Group | Inoculation  |                  |                       | Percentage of animals with positive <sup>a</sup><br>CLO test result, % |                    |          | CLO scores |
|-------|--------------|------------------|-----------------------|------------------------------------------------------------------------|--------------------|----------|------------|
|       | HP infection | Treatment        | Duration of treatment | Positive                                                               | Partially positive | Negative |            |
| I     | No           | DW               | D1-D7                 | 0                                                                      | 0                  | 100      | 0.0±0.0    |
| II    | Yes          | DW               | D1-D7                 | 80                                                                     | 20                 | 0        | 2.8±0.4    |
| III   | Yes          | AMX + CLR + PPI  | D1-D7                 | 0                                                                      | 10                 | 90       | 0.1±0.3*   |
| IV    | Yes          | AMX + S-GM + PPI | D1-D7                 | 0                                                                      | 10                 | 90       | 0.1±0.3*   |
| V     | Yes          | S-GM + PPI       | D1-D7                 | 0                                                                      | 20                 | 80       | 0.2±0.4*   |
| VI    | Yes          | AMX + S-GM + PPI | D1, D3, D5, D7        | 0                                                                      | 20                 | 80       | 0.2±0.4*   |
| VII   | Yes          | AMX + S-GM + PPI | D1, D4, D7            | 0                                                                      | 30                 | 70       | 0.3±0.5*   |
| VIII  | Yes          | AMX + S-GM + PPI | D1                    | 60                                                                     | 30                 | 10       | 2.3±1.1    |

HP, *Helicobacter pylori*; DW, distilled water; AMX, amoxicillin; CLR, clarithromycin; PPI, proton pump inhibitor; S-GM, gentamicin-intercalated smectite; CLO, *Campylobacter*-like organism

<sup>a</sup>A positive result indicates *H. pylori* colonization, which was observed as a color change in the medium from yellow to red.

\*Significantly different from Group II ( $P<0.01$ )

**Table 2. Individual data of quantitative PCR of mouse gastric mucosa after treatment of HP infection**

| Group | Inoculation  |                  |                       | Relative fold change in HP/GAPDH <sup>a</sup> |
|-------|--------------|------------------|-----------------------|-----------------------------------------------|
|       | HP infection | Treatment        | Duration of treatment |                                               |
| I     | No           | DW               | D1-D7                 | 1.06±0.39                                     |
| II    | Yes          | DW               | D1-D7                 | 25258.79±6804.29                              |
| III   | Yes          | AMX + CLR + PPI  | D1-D7                 | 4.23±5.97*                                    |
| IV    | Yes          | AMX + S-GM + PPI | D1-D7                 | 3.74±4.71*                                    |
| V     | Yes          | S-GM + PPI       | D1-D7                 | 522.90±934.89*                                |
| VI    | Yes          | AMX + S-GM + PPI | D1, D3, D5, D7        | 4.33±4.07*                                    |
| VII   | Yes          | AMX + S-GM + PPI | D1, D4, D7            | 3.20±4.24*                                    |
| VIII  | Yes          | AMX + S-GM + PPI | D1                    | 3860.59±3425.28*                              |

HP, *Helicobacter pylori*; DW, distilled water; AMX, amoxicillin; CLR, clarithromycin; PPI, proton pump inhibitor; S-GM, gentamicin-intercalated smectite.

<sup>a</sup>The data were calculated using the  $2^{-\Delta\Delta C_p}$

\*Significantly different from Group II ( $P<0.01$ )

**Table 3. Plasma cytokine concentrations of IL-8 and TNF-  $\alpha$  in each group**

| Group | HP Infection | IL-8 (pg/mL)      | TNF- $\alpha$ (pg/mL) | Atrophy         | Fecal microbiome  |                       |               |            |
|-------|--------------|-------------------|-----------------------|-----------------|-------------------|-----------------------|---------------|------------|
|       |              |                   |                       |                 | Alpha diversity   |                       | Abundance (%) |            |
|       |              |                   |                       |                 | Shannon           | Chao 1                | Bacteroidetes | Firmicutes |
| I     | No           | 17.13 $\pm$ 5.66* | 225.00 $\pm$ 253.55   | 0.00 $\pm$ 0.00 | 3.86 $\pm$ 0.71   | 523.58 $\pm$ 96.92    | 22.47         | 55.81      |
| II    | Yes          | 31.48 $\pm$ 6.37  | 745.00 $\pm$ 485.64   | 1.60 $\pm$ 0.52 | 3.78 $\pm$ 0.60   | 483.81 $\pm$ 81.67    | 28.84         | 53.87      |
| III   | Yes          | 18.60 $\pm$ 9.06* | 564.50 $\pm$ 549.98   | 1.50 $\pm$ 0.85 | 2.92 $\pm$ 0.53** | 245.71 $\pm$ 121.23** | 1.59**        | 58.67      |
| IV    | Yes          | 14.70 $\pm$ 6.70* | 442.50 $\pm$ 328.69   | 1.20 $\pm$ 0.79 | 3.13 $\pm$ 0.55   | 440.45 $\pm$ 213.56†  | 29.36†        | 29.72      |

Data are expressed as mean  $\pm$  standard error of 10 mice per group ( $\mu$ g/mL).

\*Significantly different from the positive control (Group II) ( $P$ <0.05)

\*\*Significantly different from Groups I and II ( $P$ <0.05)

†Significantly different from Group III ( $P$ <0.05)

## **Figure legends**

**Figure 1. Alpha diversity in fecal microbiome between four groups**

**Figure 2. Microbiota composition and relative abundance distributions in four groups**

**Figure 3. Comparison of microbial communities using principal coordinate analysis**

(A) Shannon index

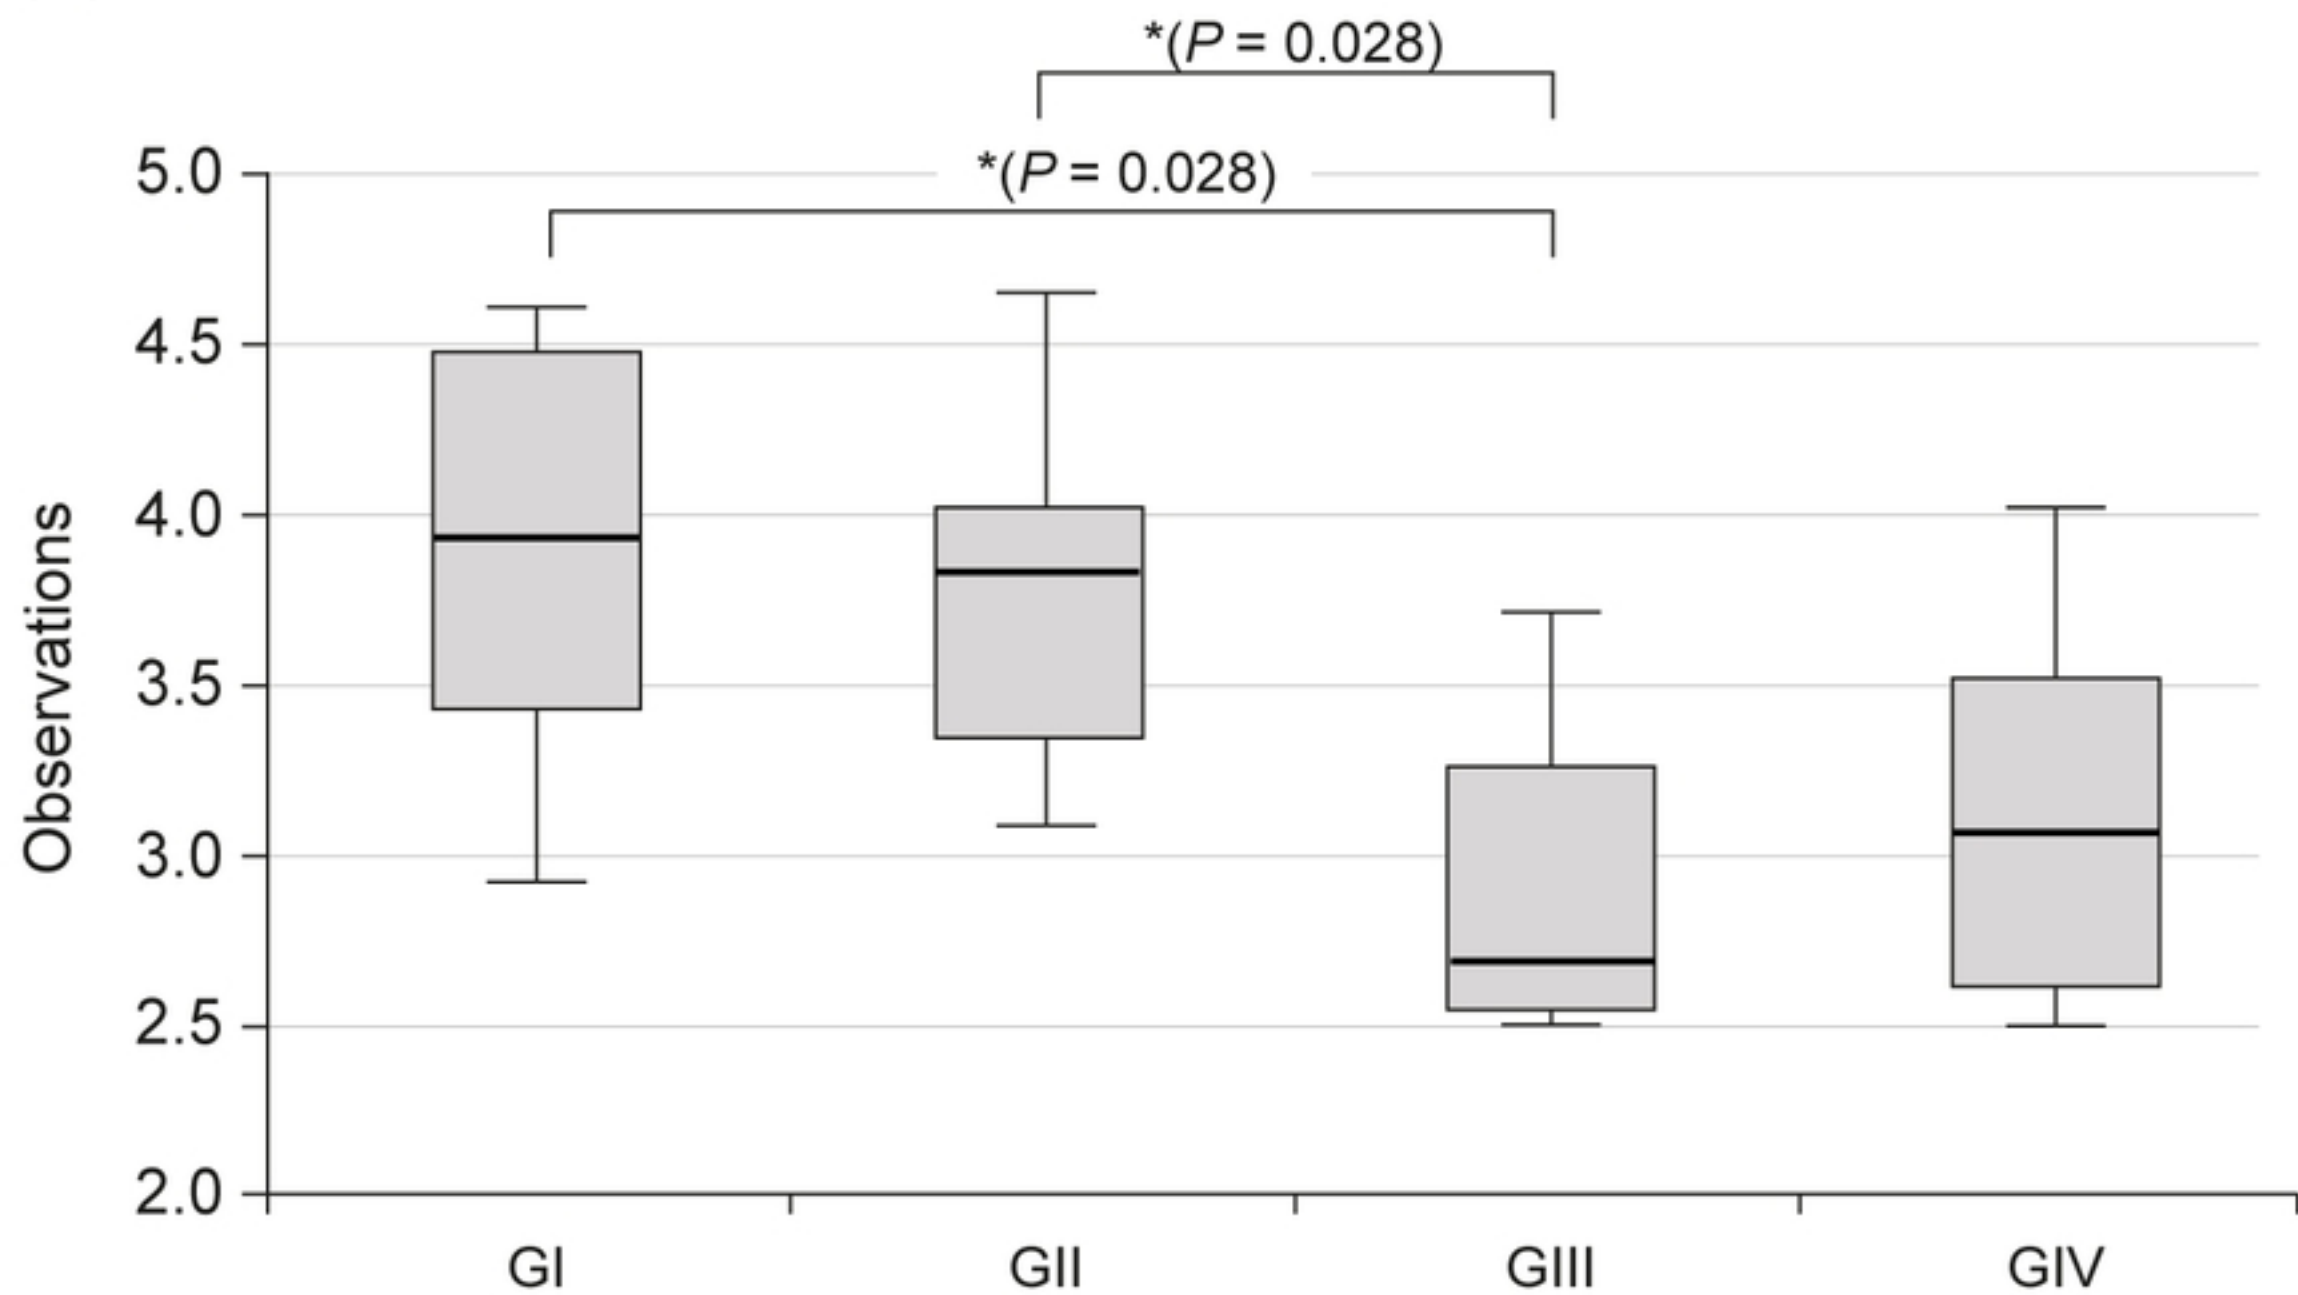

Figure 1A



(B) Chao1

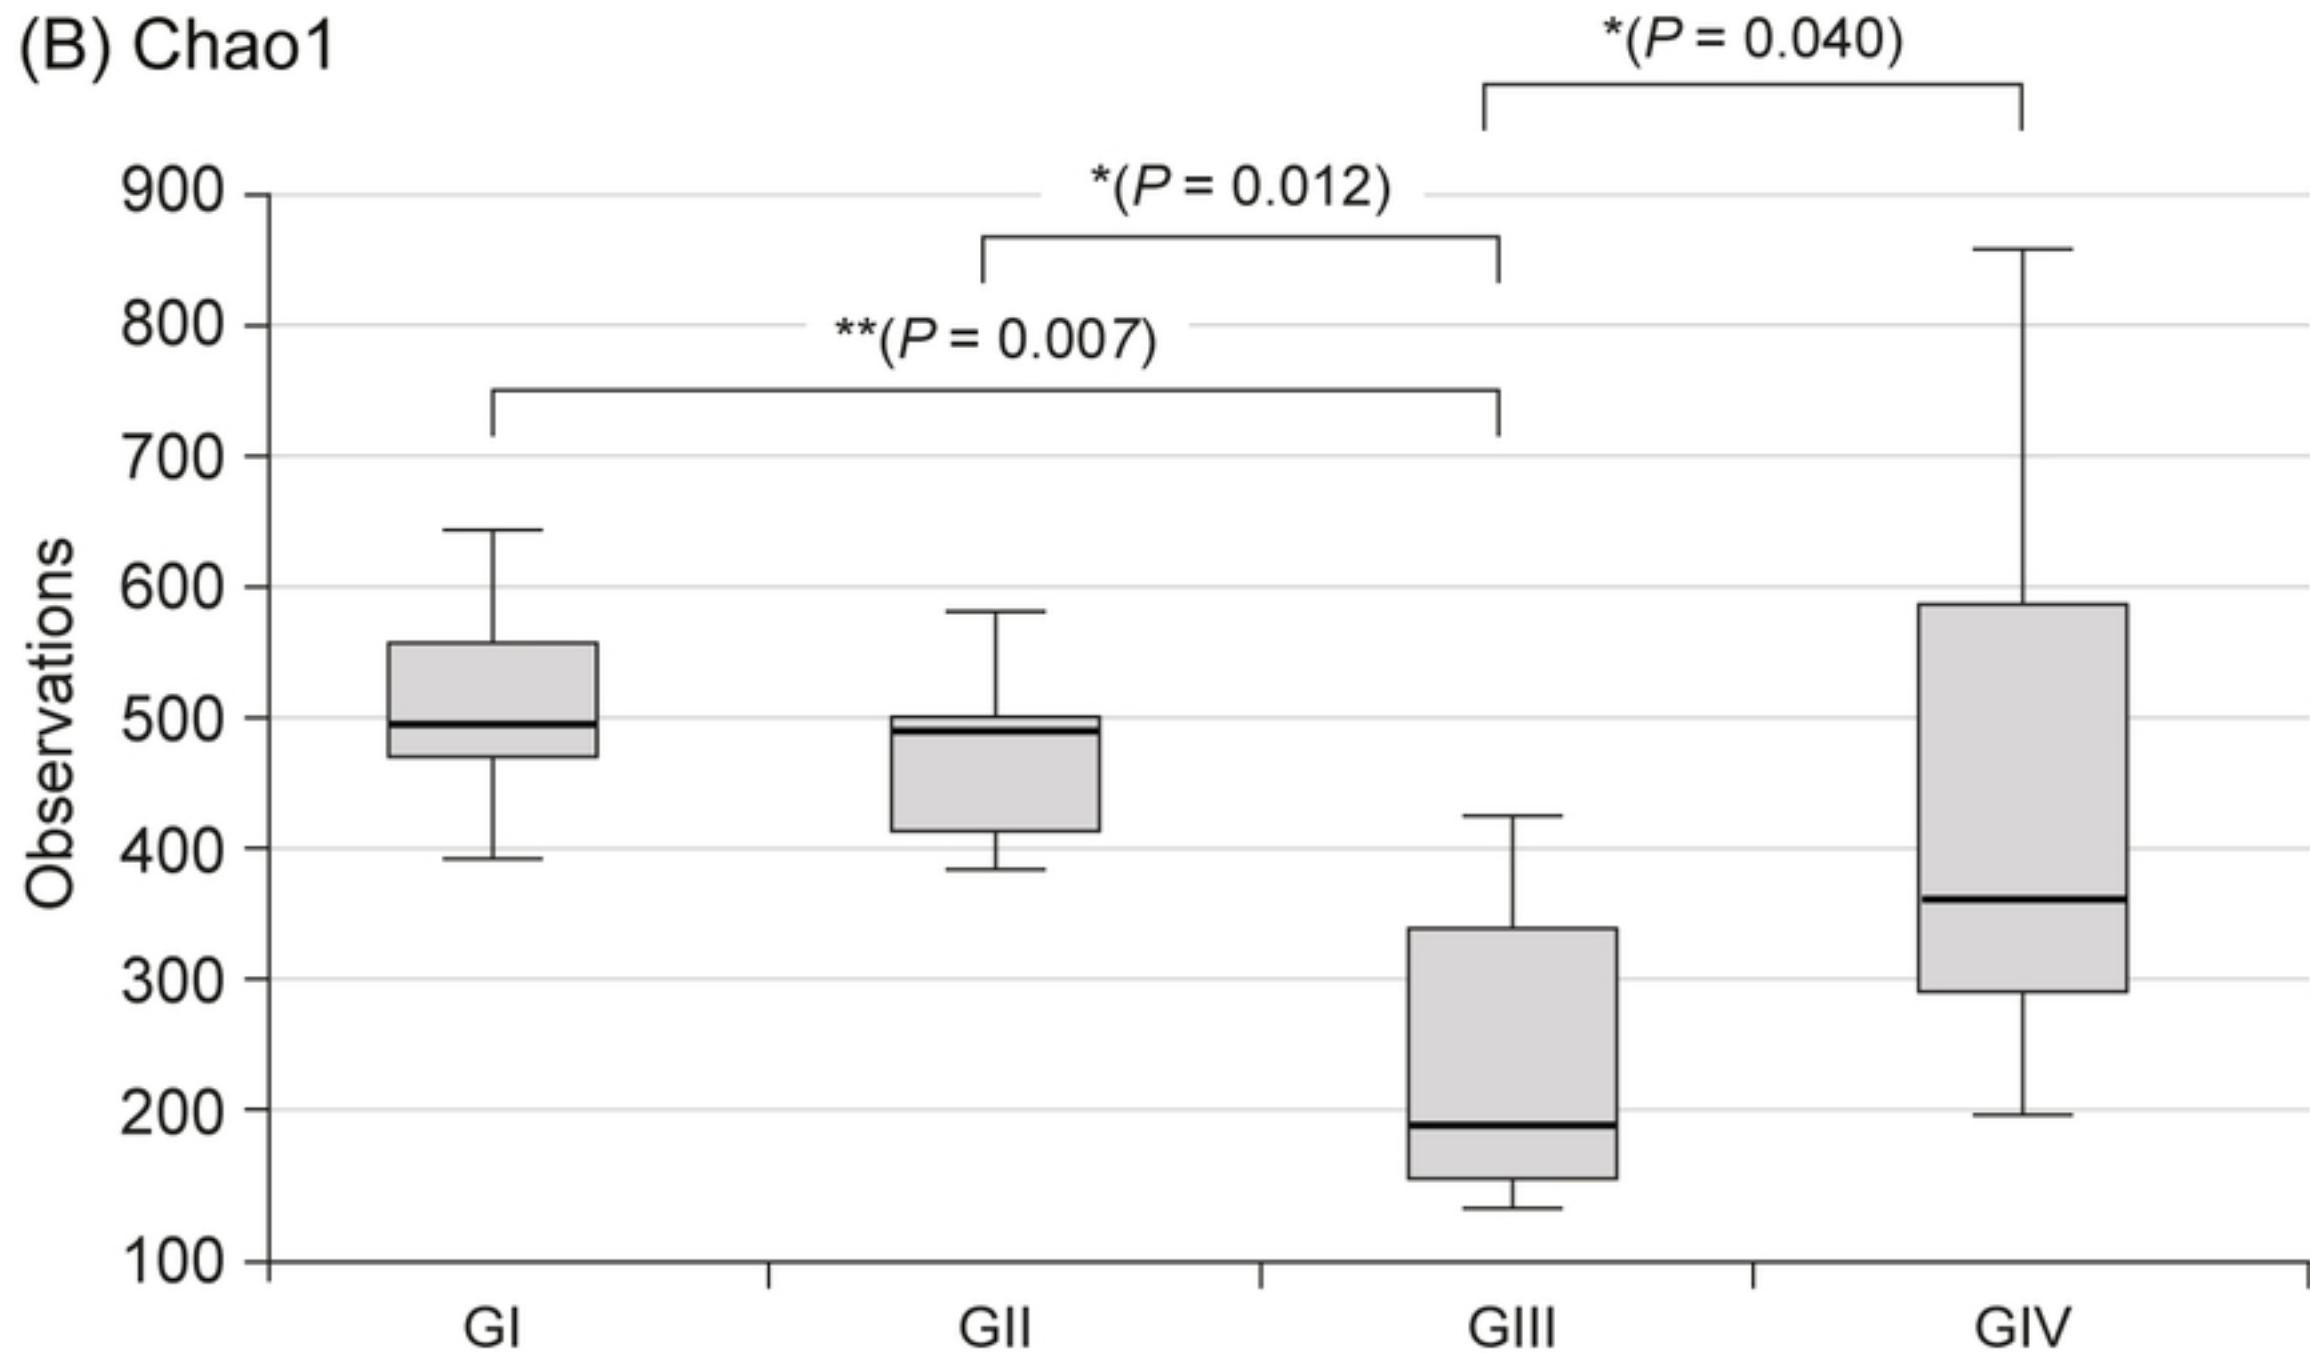

Figure 1B

(B) Bacteroidetes

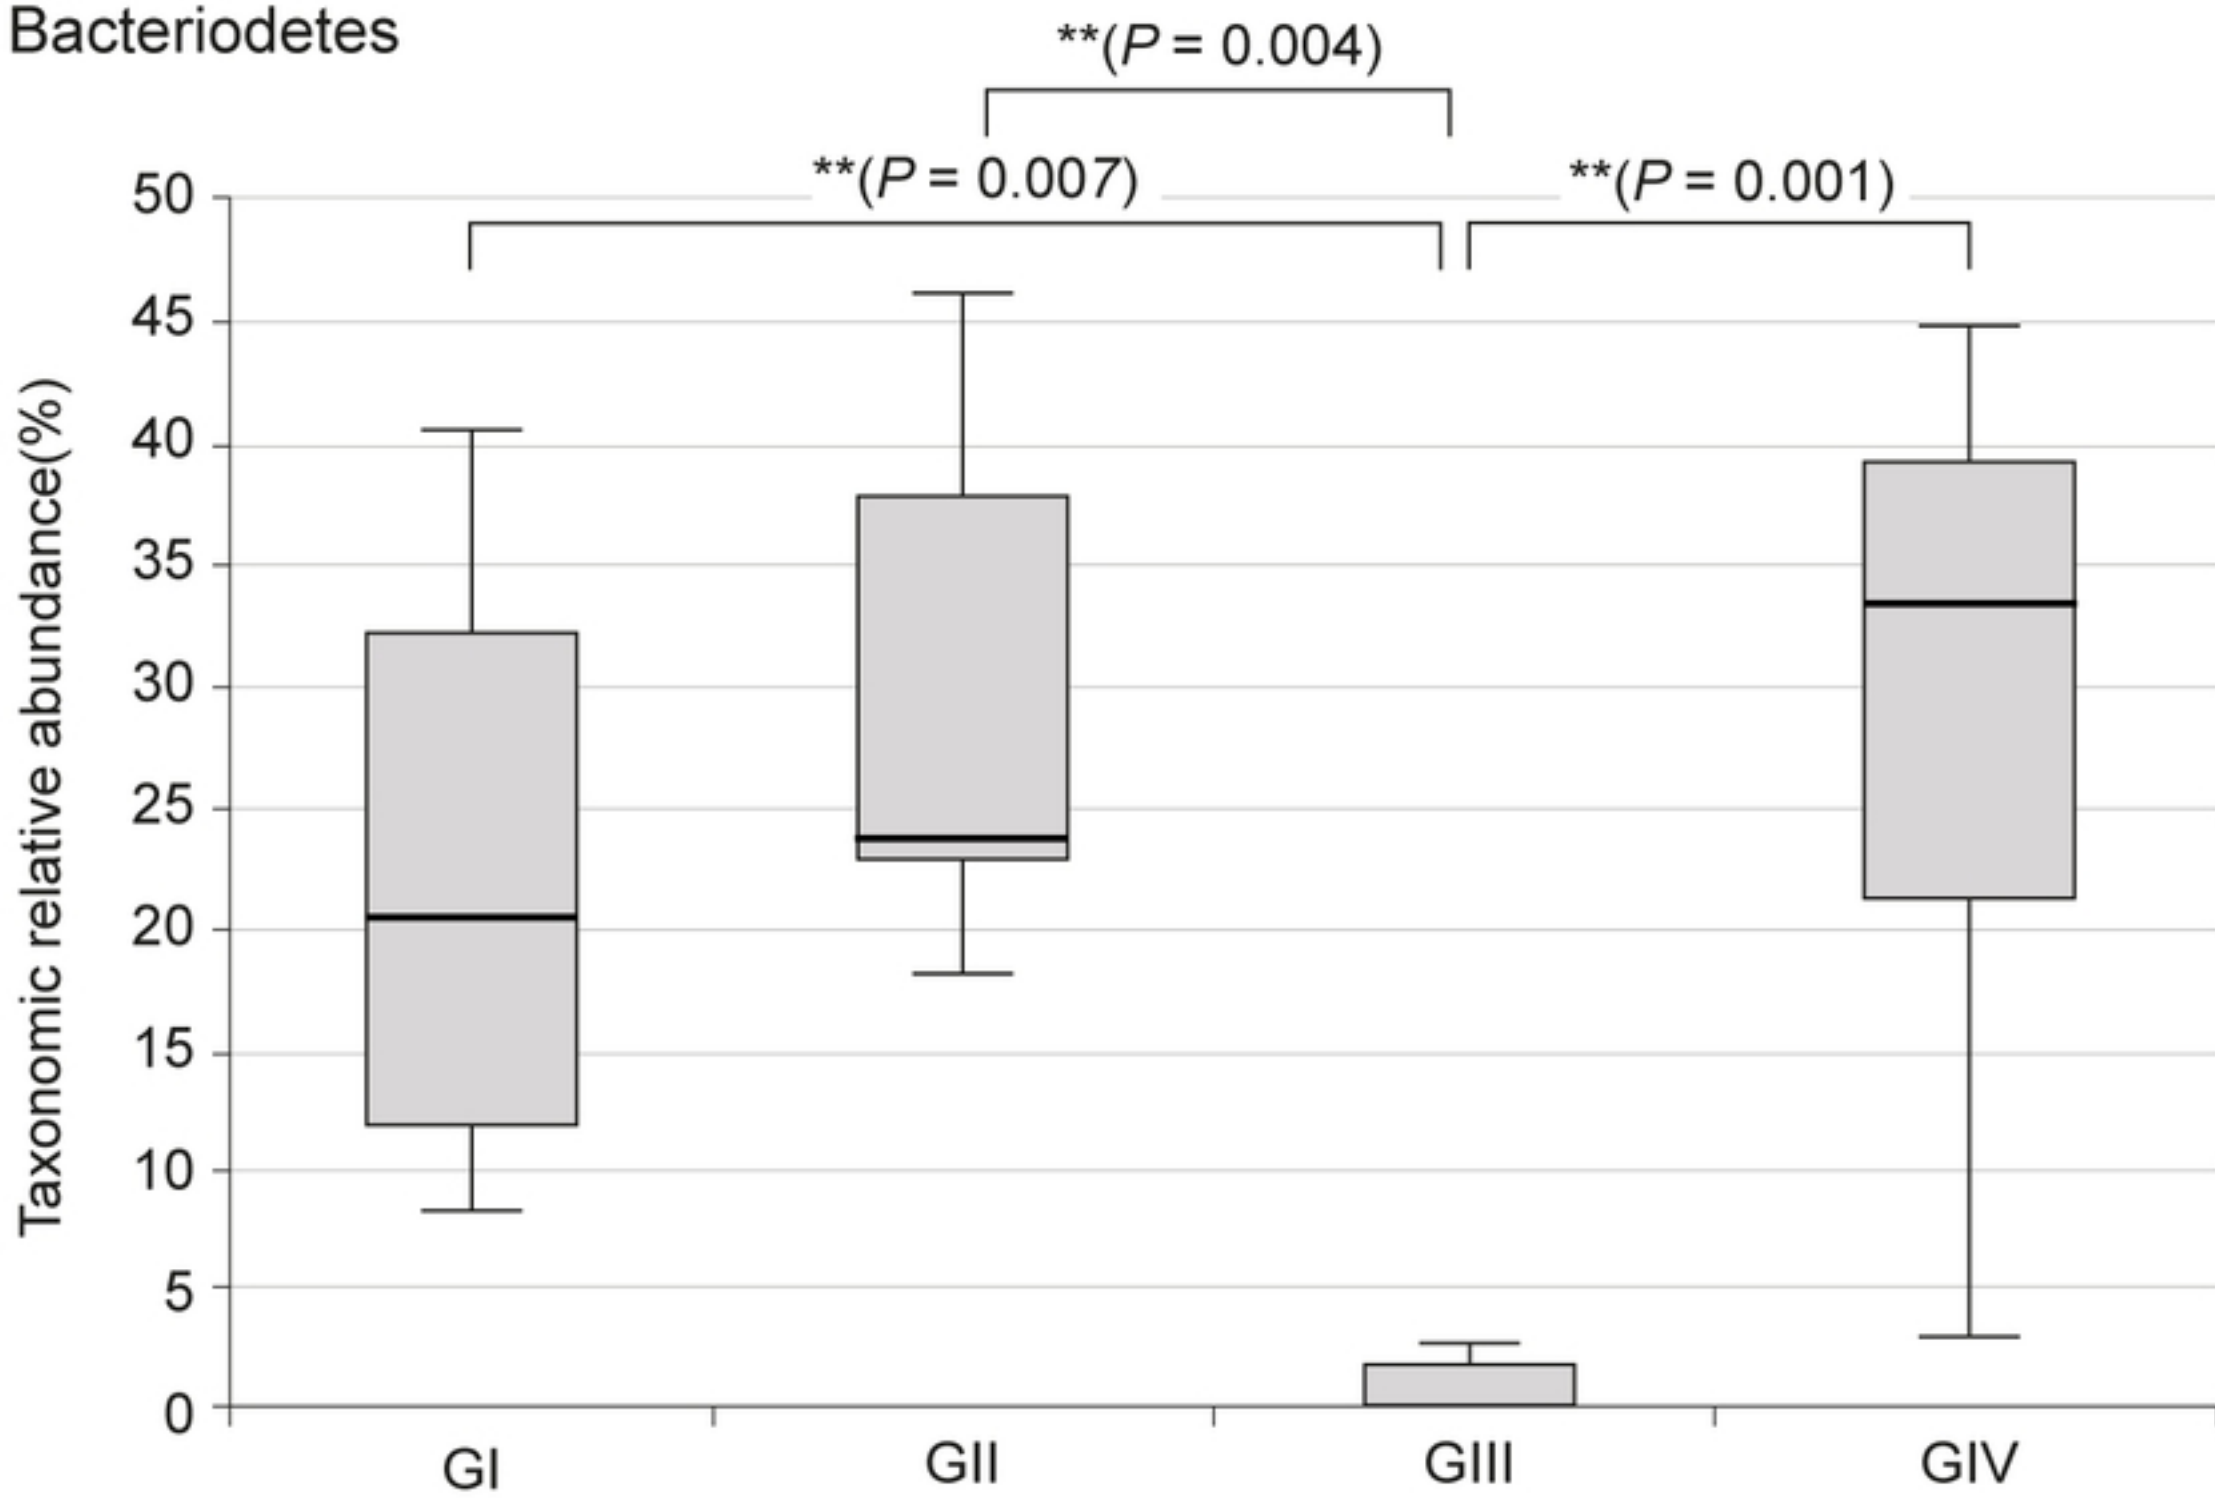

Figure

### (C) Class level

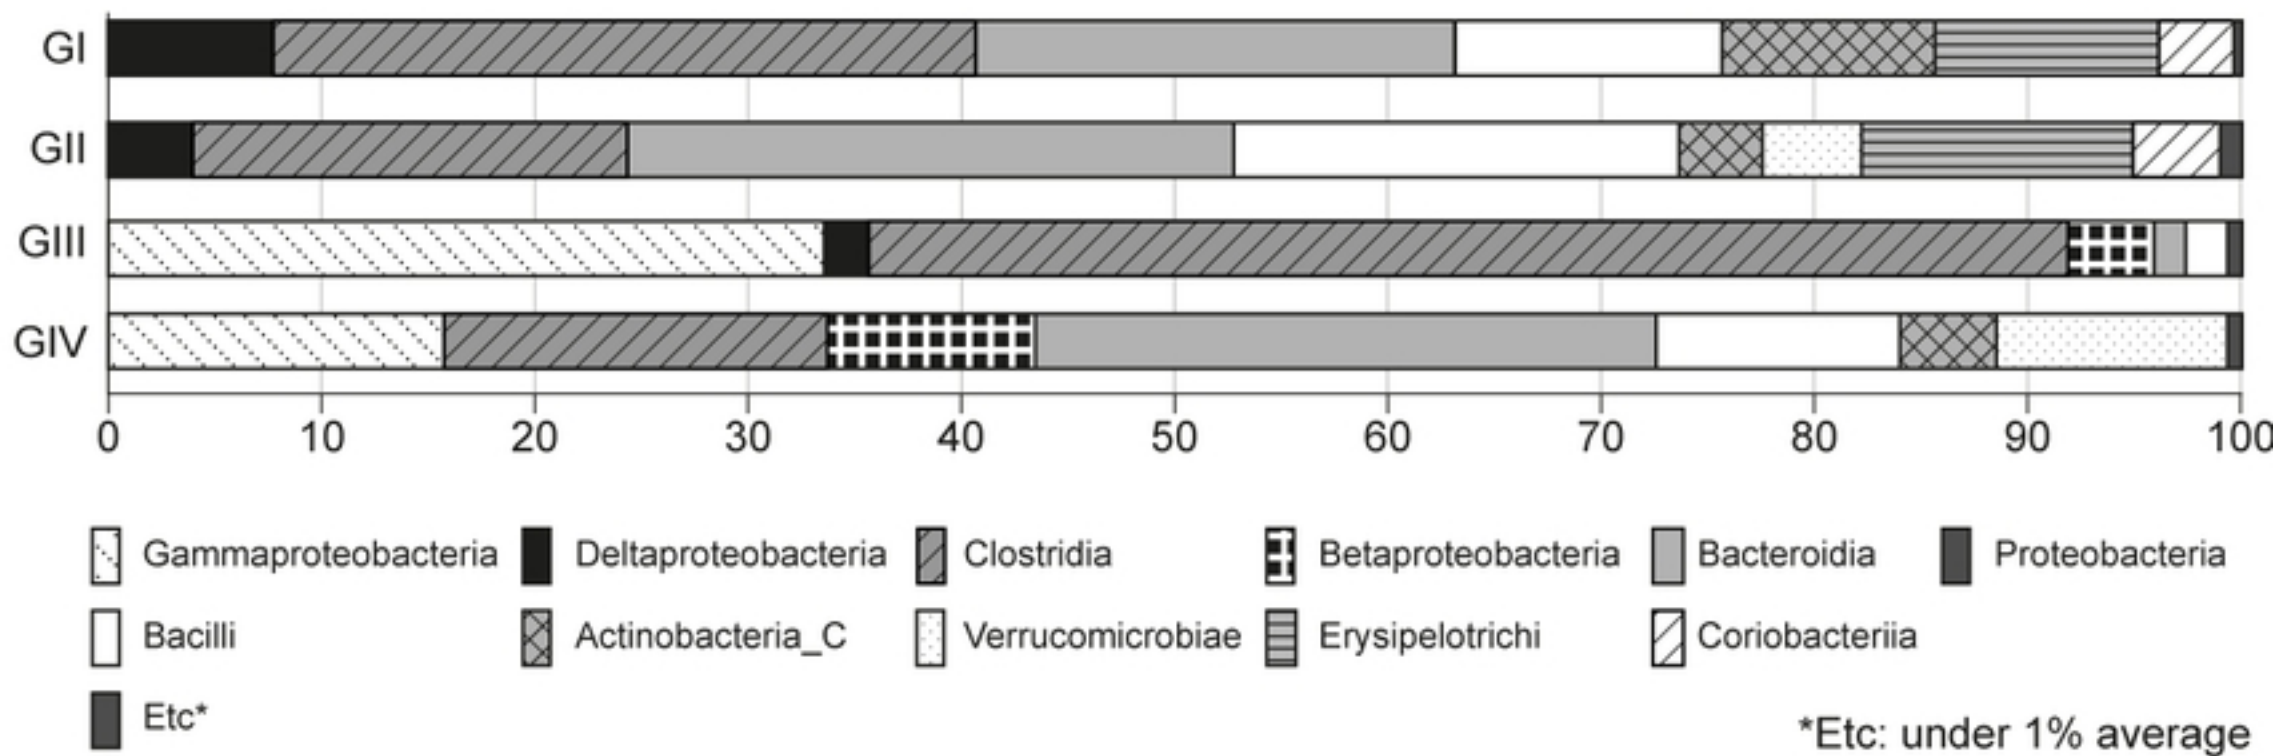

Figure

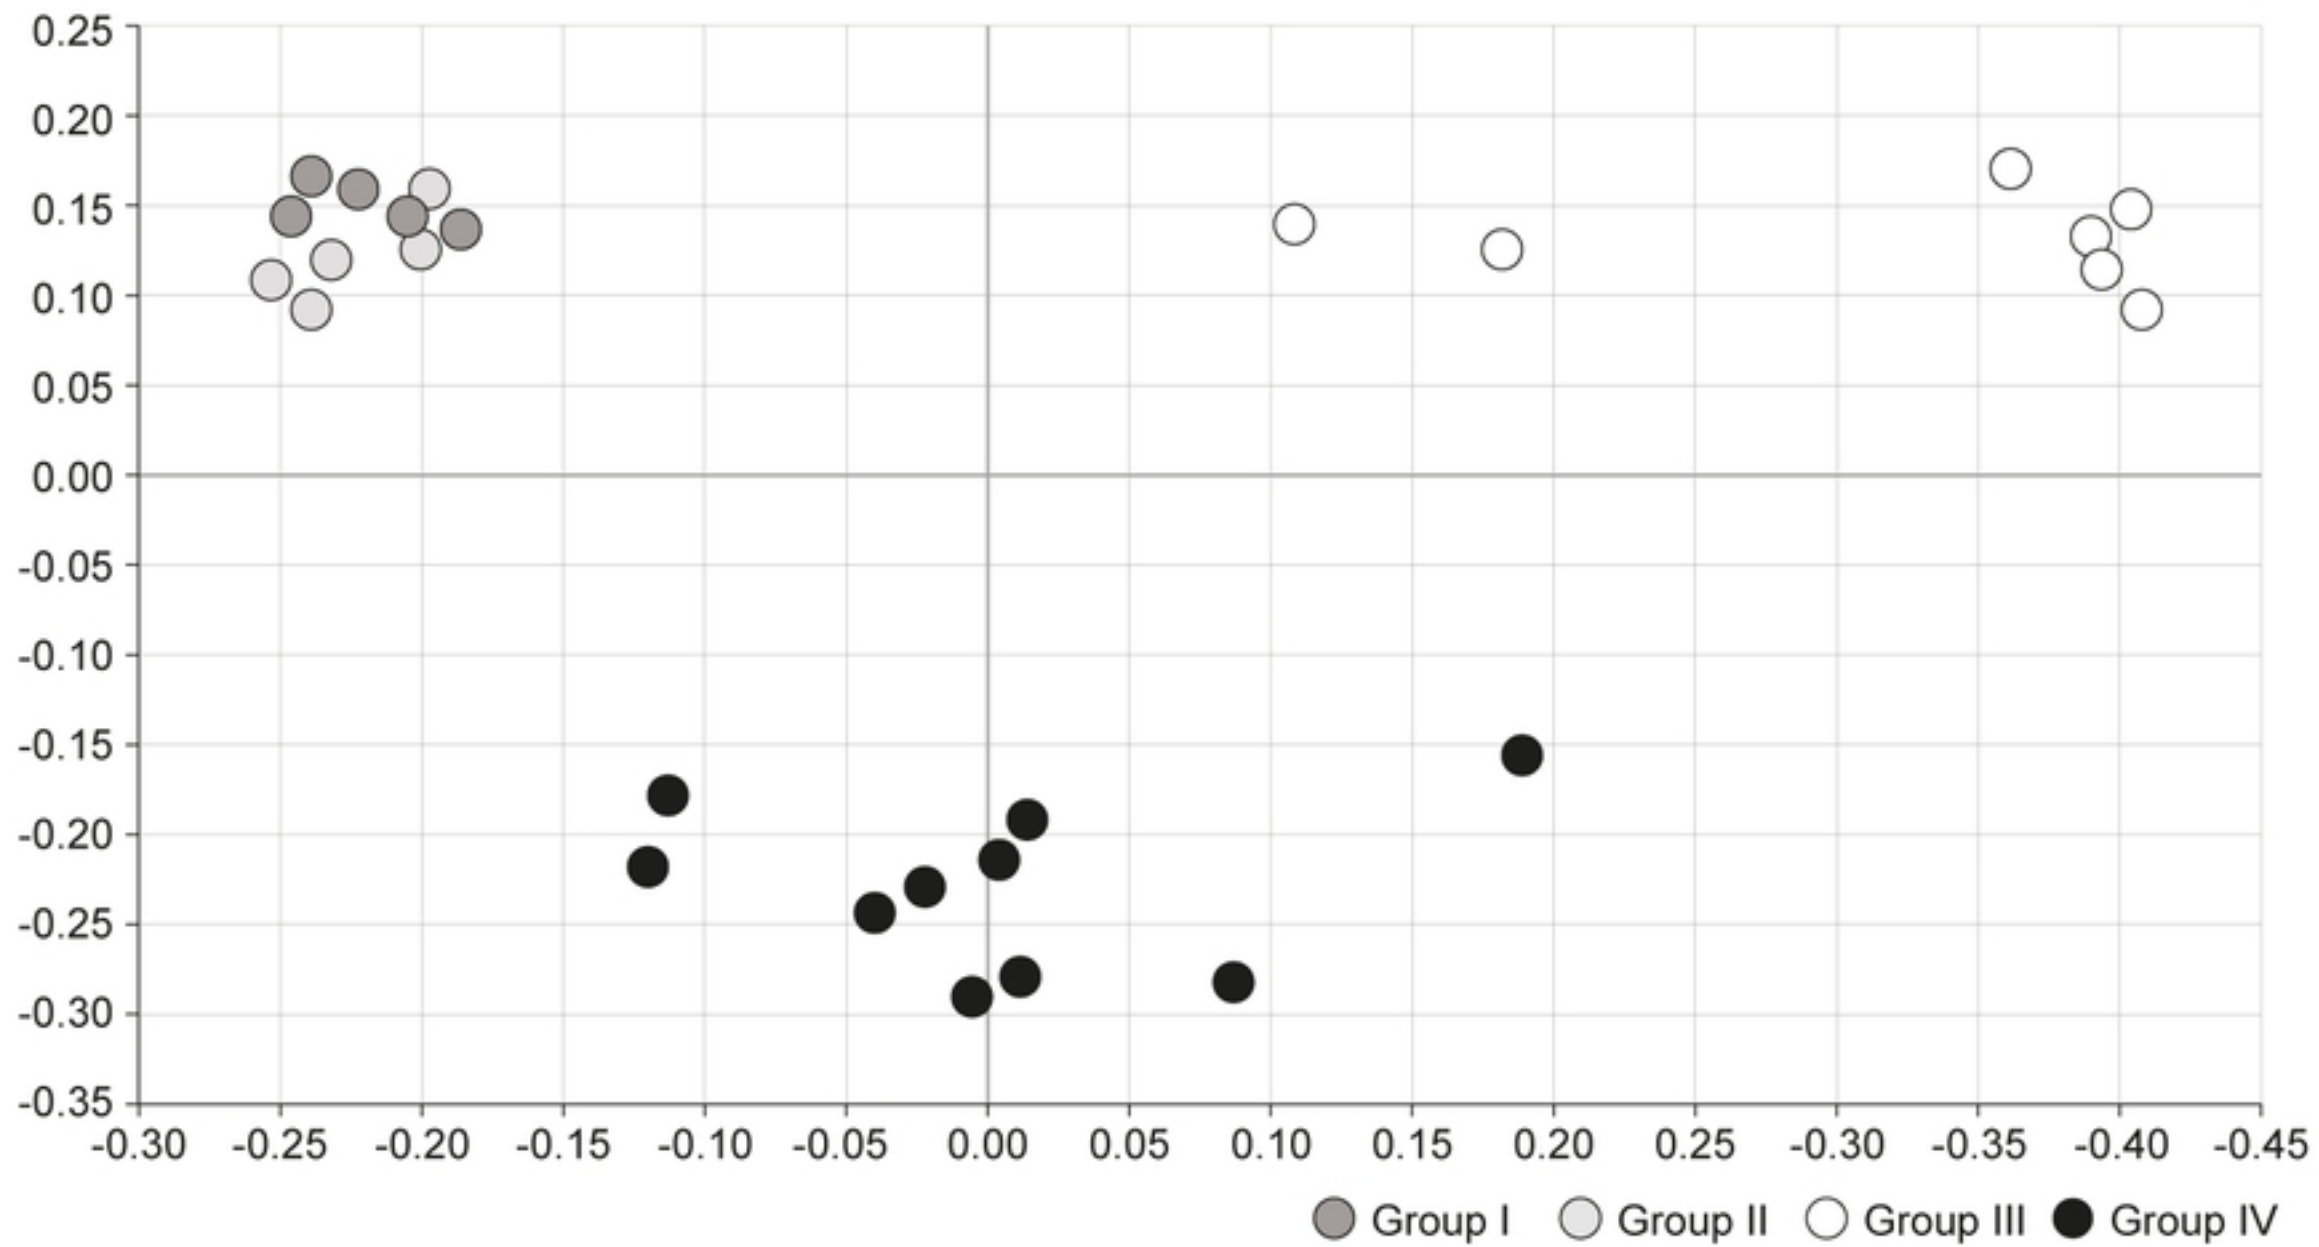

Figure

# (A) Phylum level

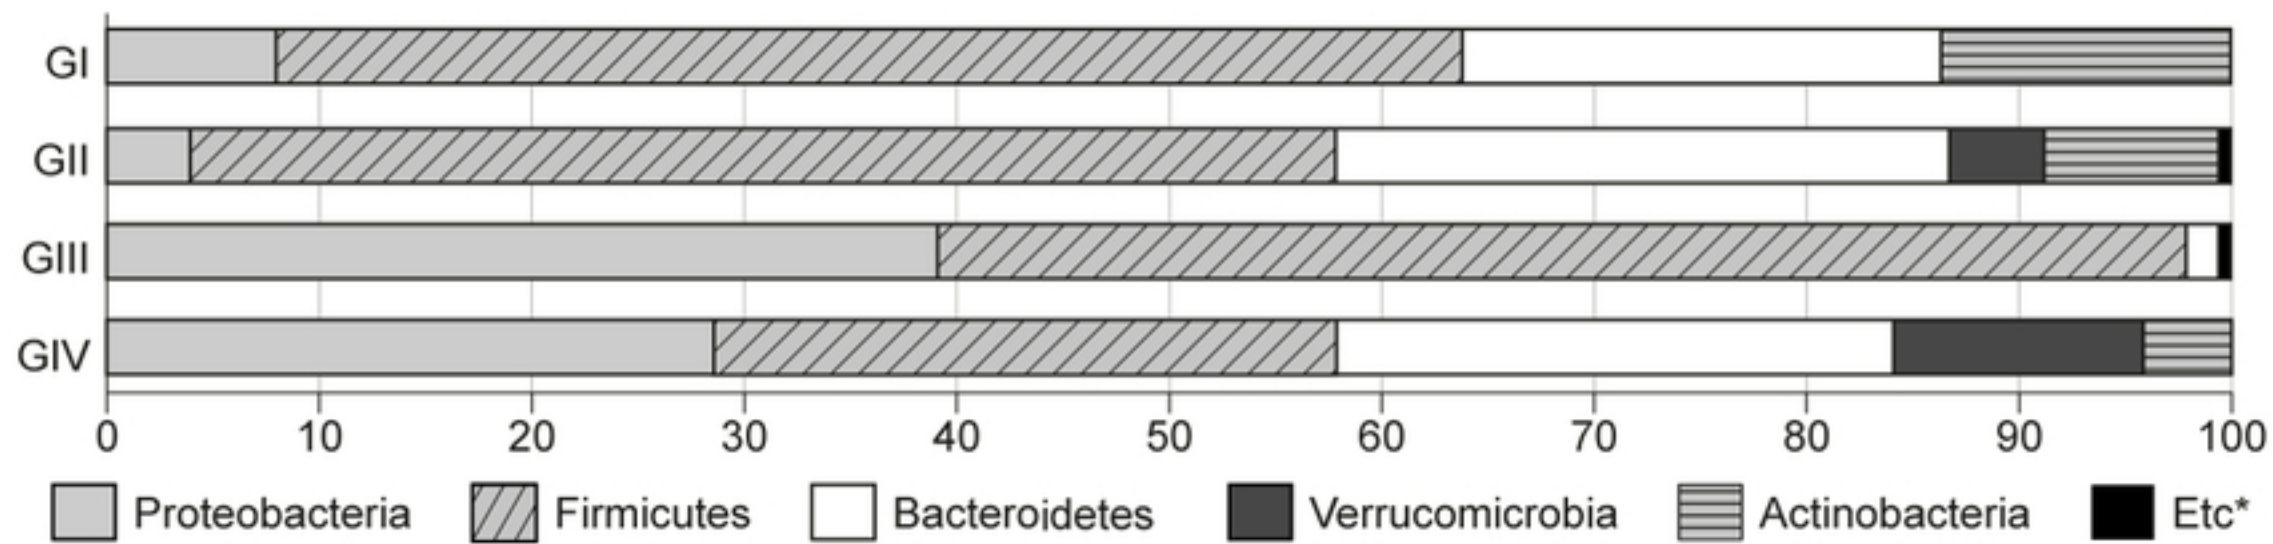

\*Etc: under 1% average

Figure
